# Supplementary material for: Effectiveness of a Lifestyle Modification Program Delivered under Real-World Conditions in a Rural Setting
Source: MDPI journal article supplement (doi:10.3390/nu13114040), 2021-11-12
Supplement: s1 [file s1]

**Table S1.** Comparison of individuals who accepted and did not accept the referral to HEAL™.

|                                          | $\chi^2$ or <i>F</i> | <i>df</i> | <i>p</i>   |
|------------------------------------------|----------------------|-----------|------------|
| Age                                      | 3.05                 | 1         | .08        |
| <b>Gender</b>                            | <b>6.11</b>          | <b>1</b>  | <b>.02</b> |
| Aboriginal and/or Torres Strait Islander | 0.10                 | 1         | .83        |
| <b>Healthcare card</b>                   | <b>7.33</b>          | <b>1</b>  | <b>.01</b> |
| Socioeconomic status                     | 5.44                 | 4         | .25        |
| <b>Remoteness</b>                        | <b>12.74</b>         | <b>4</b>  | <b>.01</b> |

Note: Bold indicates significant.

**Table S2.** Comparison of participants who completed the eight-week follow-up assessment and non-completers.

|                                          | $\chi^2$ or <i>F</i> | <i>df</i> | <i>p</i>        |
|------------------------------------------|----------------------|-----------|-----------------|
| Age                                      | <b>5.95</b>          | <b>1</b>  | <b>.02</b>      |
| Gender                                   | 0.51                 | 1         | .48             |
| Aboriginal and/or Torres Strait Islander | 0.10                 | 1         | .87             |
| Healthcare card                          | 0.004                | 1         | .95             |
| Socioeconomic status                     | <b>12.1</b>          | <b>4</b>  | <b>.02</b>      |
| Remoteness                               | <b>15.90</b>         | <b>4</b>  | <b>.003</b>     |
| Completed sessions                       | <b>105.64</b>        | <b>1</b>  | <b>&lt;.001</b> |
| Walking (min/week)                       | 1.67                 | 1         | .20             |
| Planned PA (min/week)                    | 0.05                 | 1         | .82             |
| Incidental PA (min/week)                 | 1.60                 | 1         | .20             |
| Total PA (min/week)                      | 3.33                 | 1         | .07             |
| Sitting time (hours/day)                 | 2.00                 | 1         | .16             |
| Fruit (serves/day)                       | 1.94                 | 1         | .17             |
| Vegetables (serves/day)                  | 0.26                 | 1         | .61             |
| Weight (kg)                              | <b>17.86</b>         | <b>1</b>  | <b>&lt;.001</b> |
| Waist circumference                      | <b>13.24</b>         | <b>1</b>  | <b>&lt;.001</b> |
| Systolic BP (mmHg)                       | 2.28                 | 1         | .13             |
| Diastolic BP (mmHg)                      | 0.04                 | 1         | .84             |
| 30-sec chair stand (n)                   | <b>3.95</b>          | <b>1</b>  | <b>.48</b>      |
| 30-sec arm curl (n)                      | 1.56                 | 1         | .22             |
| 6-min walk (m)                           | 0.99                 | 1         | .32             |

Note: Bold indicates significant.
